# Supplementary material for: Impacts of Medications on Microbiome-mediated Protection against Enteric Pathogens
Source: Research Square preprint supplement (doi:10.21203/rs.3.rs-5199936/v1), 2024-10-18
Supplement: Supplementary file 1 [file Extended_Data_Table_1.xlsx]

## Sheet: Table_1
Description	N
Number of patients in PopHR cohort	1434375
Number of patients with ICD9/10 code for GI illness of infectious origin between 1999 and 2014	87373
Number of patients with GI ICD code and continuous RAMQ drug insurance during case and control periods	42988
Characteristics of the 42,998 Patients in the Study Population
	Mean	SD
Age	49.53	29.57
Sex	N	%
Female	24120	56.1
Male	18868	43.9
Most Frequent Gastrointestinal Infections
Infectious Colitis, enteritis, gastroenteritis *	1203
Food Poisoning	7655
Enterocolitis due to C Difficile	7266
Ill-defined intestinal infections, infectious diarrhea	4570
Diarrhea and gastroenteritis presumed infectious	2429
Intestinal infection due to other organism	1573
Salmonella gastroenteritis	1259
Number of Prescription Drugs	Mean	SD	Significance
Case Period	3.94	4.96	Not Significant
Control Period	3.66	4.7
*Includes colitis, enteritis, gastroenteritis of presumed infectious origin
