# Supplementary material for: Impacts of Medications on Microbiome-mediated Protection against Enteric Pathogens
Source: Research Square preprint supplement (doi:10.21203/rs.3.rs-5199936/v1), 2024-10-18
Supplement: Supplementary file 2 [file Extended_Data_Table_2.xlsx]

## Sheet: Table_2
Drug Class	Significance on class level (P<0.05)	Corresponding letter in Fig. 1b	Expected drug class	Drug Agent	Corresponding number in Fig. 1b	OR	P value	Impact of drug on GI infection risk (Up, OR>1.5 and P<0.05; NotSig, 0.8<OR<1.5 and/or P>0.05; Down, OR<0.8 and P<0.05)	Prescription number	Prescription proportion of individual drug within their respective class	Follow-up study in mice
Anti-microbial agents	Yes	a	Yes	Ciprofloxacin	1	1.89	< 0.0001	Up	3243	0.16	No
Anti-microbial agents	Yes	a	Yes	Amoxicillin	2	1.16	0.0014	NotSig	2826	0.14	No
Anti-microbial agents	Yes	a	Yes	Azithromycin	3	1.19	0.0019	NotSig	1714	0.09	No
Anti-microbial agents	Yes	a	Yes	Sulfamethoxazole+Trimethoprim	4	1.41	< 0.0001	NotSig	1540	0.08	No
Anti-microbial agents	Yes	a	Yes	Clarithromycin	5	1.26	0.0002	NotSig	1439	0.07	No
Anti-microbial agents	Yes	a	Yes	Metronidazole	6	3.22	< 0.0001	Up	1398	0.07	No
Anti-microbial agents	Yes	a	Yes	Hydroxychloroquine	7	1	1	NotSig	1014	0.05	No
Anti-microbial agents	Yes	a	Yes	Amoxicillin+Clavulanate	8	1.72	< 0.0001	Up	998	0.05	No
Anti-microbial agents	Yes	a	Yes	Moxifloxacin	9	1.77	< 0.0001	Up	921	0.05	No
Anti-microbial agents	Yes	a	Yes	Cefprozil	10	1.15	0.1147	NotSig	749	0.04	No
Anti-microbial agents	Yes	a	Yes	Clindamycin	11	1.83	< 0.0001	Up	693	0.03	No
Anti-microbial agents	Yes	a	Yes	Levofloxacin	12	1.82	< 0.0001	Up	672	0.03	No
Anti-microbial agents	Yes	a	Yes	Penicillin V	13	1.16	0.1007	NotSig	648	0.03	No
Anti-microbial agents	Yes	a	Yes	Valacyclovir	14	1.51	0.0053	Up	591	0.03	No
Anti-microbial agents	Yes	a	Yes	Cephalexin	15	1.76	< 0.0001	Up	541	0.03	No
Anti-microbial agents	Yes	a	Yes	Lamivudine	16	1.33	0.7064	NotSig	291	0.01	No
Anti-microbial agents	Yes	a	Yes	Amantadine	17	2.5	0.1214	NotSig	185	0.01	No
Anti-microbial agents	Yes	a	Yes	Famciclovir	18	1.97	0.0009	Up	183	0.01	No
Anti-microbial agents	Yes	a	Yes	Ritonavir	19	2	0.5715	NotSig	120	0.01	No
Anti-microbial agents	Yes	a	Yes	Isoniazid	20	4	0.0795	NotSig	114	0.01	No
Immunosuppressive Agents	Yes	b	Yes	Azathioprine	21	1.1	0.8273	NotSig	508	0.35	No
Immunosuppressive Agents	Yes	b	Yes	Mycophenolate Mofetil	22	1.5	0.4417	NotSig	477	0.33	No
Immunosuppressive Agents	Yes	b	Yes	Tacrolimus	23	2.13	0.0787	NotSig	446	0.31	No
Antidiarrhea Agents	Yes	c	Yes	Loperamide	24	2.6	< 0.0001	Up	1564	1	No
Analgesics and Antipyretics	Yes	d	Yes	Acetaminophen	25	1.363	< 0.0001	NotSig	14760	0.3	No
Analgesics and Antipyretics	Yes	d	Yes	Asa	26	0.834	0.0946	NotSig	11356	0.23	No
Analgesics and Antipyretics	Yes	d	Yes	Hydromorphone	27	2.057	< 0.0001	Up	4347	0.09	No
Analgesics and Antipyretics	Yes	d	Yes	Celecoxib	28	0.92	0.2341	NotSig	4234	0.09	No
Analgesics and Antipyretics	Yes	d	Yes	Codeine+Acetaminophen	29	1.518	< 0.0001	Up	3123	0.06	No
Analgesics and Antipyretics	Yes	d	Yes	Oxycodone	30	1.622	< 0.0001	Up	2518	0.05	No
Analgesics and Antipyretics	Yes	d	Yes	Naproxen	31	1.162	0.0467	NotSig	2013	0.04	No
Analgesics and Antipyretics	Yes	d	Yes	Rofecoxib	32	1.245	0.0174	NotSig	1839	0.04	No
Analgesics and Antipyretics	Yes	d	Yes	Morphine	33	2.12	< 0.0001	Up	1685	0.03	No
Analgesics and Antipyretics	Yes	d	Yes	Fentanyl	34	1.638	0.0077	Up	1154	0.02	No
Analgesics and Antipyretics	Yes	d	Yes	Diclofenac+Misoprostol	35	1.033	0.8264	NotSig	813	0.02	No
Analgesics and Antipyretics	Yes	d	Yes	Codeine	36	1.49	0.0016	NotSig	758	0.02	No
Antiemetics	Yes	e	Yes	Ondansetron	37	1.74	0.0552	NotSig	208	0.55	No
Antiemetics	Yes	e	Yes	Nabilone	38	1.5	0.5299	NotSig	171	0.45	No
Cathartics and Laxatives	Yes	f	Yes	Docusate Sodium	39	2.37	< 0.0001	Up	4979	0.62	No
Cathartics and Laxatives	Yes	f	Yes	Sennosides A B	40	1.98	< 0.0001	Up	3087	0.38	No
5-a-Reductase Inhibitors	Yes	g	No	Finasteride	41	1.789	0.0422	Up	1798	0.52	Yes
5-a-Reductase Inhibitors	Yes	g	No	Dutasteride	42	1.467	0.2527	NotSig	1675	0.48	No
Adrenals	Yes	h	No	Prednisone	43	1.871	< 0.0001	Up	7833	0.48	No
Adrenals	Yes	h	No	Fluticasone	44	1.28	< 0.0001	NotSig	5814	0.36	No
Adrenals	Yes	h	No	Dexamethasone	45	1.582	< 0.0001	Up	855	0.05	No
Adrenals	Yes	h	No	Budesonide	46	1.117	0.4166	NotSig	789	0.05	No
Adrenals	Yes	h	No	Hydrocortisone	47	1.076	0.3692	NotSig	477	0.03	No
Adrenals	Yes	h	No	Fludrocortisone	48	8	0.0499	Up	330	0.02	No
Adrenals	Yes	h	No	Prednisolone	49	0.88	0.1983	NotSig	184	0.01	No
Allylamines	Yes	i	No	Nystatin	50	1.498	< 0.0001	NotSig	739	0.43	No
Allylamines	Yes	i	No	Fluconazole	51	1.416	0.0047	NotSig	716	0.42	No
Allylamines	Yes	i	No	Terbinafine	52	1.27	0.0479	NotSig	254	0.15	No
Alpha-Adrenergic Blocking Agents	Yes	j	No	Terazosin	53	3.75	0.0188	Up	979	0.62	No
Alpha-Adrenergic Blocking Agents	Yes	j	No	Doxazosin	54	1.4	0.4164	NotSig	601	0.38	No
Androgens	No	k	No	Testosterone	55	1.833	0.2324	NotSig	351	1	No
Anti-inflammatory Agents(EENT)	No	l	No	Diclofenac	56	0.967	0.7971	NotSig	53	1	No
Anti-inflammatory Agents(Gastrointestina	Yes	m	No	Mesalamine	57	2.16	< 0.0001	Up	2184	1	No
Antianemia Drugs	Yes	n	No	Ferrous Sulfate	58	2.067	< 0.0001	Up	11311	0.99	Yes
Antianemia Drugs	Yes	n	No	Iron Dextran	59	2.667	0.0405	Up	111	0.01	No
Antianemia Drugs	Yes	n	No	Iron Sorbitol	60	1	1	NotSig	28	0	No
Antianemia Drugs	Yes	n	No	Iron Sucrose	61	0.4	0.2734	NotSig	24	0	No
Anticonvulsants	Yes	o	No	Clonazepam	62	1.527	< 0.0001	Up	10187	0.34	Yes
Anticonvulsants	Yes	o	No	Gabapentin	63	1.31	0.0308	NotSig	4833	0.16	No
Anticonvulsants	Yes	o	No	Pregabalin	64	1.644	0.0002	Up	4751	0.16	No
Anticonvulsants	Yes	o	No	Divalproex	65	1	1	NotSig	3005	0.1	No
Anticonvulsants	Yes	o	No	Phenytoin	66	3.571	< 0.0001	Up	2242	0.07	No
Anticonvulsants	Yes	o	No	Carbamazepine	67	1.565	0.0933	NotSig	1894	0.06	No
Anticonvulsants	Yes	o	No	Topiramate	68	0.625	0.2436	NotSig	678	0.02	No
Anticonvulsants	Yes	o	No	Clobazam	69	1.2	0.7633	NotSig	533	0.02	No
Anticonvulsants	Yes	o	No	Valproic Acid	70	0.75	0.7064	NotSig	461	0.02	No
Anticonvulsants	Yes	o	No	Lamotrigine	71	1.286	0.618	NotSig	421	0.01	No
Anticonvulsants	Yes	o	No	Primidone	72	3.5	0.1182	NotSig	330	0.01	No
Anticonvulsants	Yes	o	No	Phenobarbital	73	3.5	0.1182	NotSig	329	0.01	No
Anticonvulsants	Yes	o	No	Levetiracetam	74	3.5	0.0271	Up	284	0.01	No
Antidiabetic Agents	No	p	No	Glyburide	75	0.914	0.5023	NotSig	9494	0.75	No
Antidiabetic Agents	No	p	No	Gliclazide	76	1.333	0.2336	NotSig	3194	0.25	No
Antigout Agents	Yes	q	No	Allopurinol	77	1.415	0.032	NotSig	6908	0.87	No
Antigout Agents	Yes	q	No	Colchicine	78	1.178	0.4195	NotSig	1068	0.13	No
Antihemorrhagic Agents	Yes	r	No	Tranexamic Acid	79	3.25	0.0393	Up	74	1	No
Antilipemic Agents	No	s	No	Atorvastatin	80	1.066	0.5036	NotSig	29062	0.58	No
Antilipemic Agents	No	s	No	Rosuvastatin	81	0.873	0.4114	NotSig	6769	0.14	No
Antilipemic Agents	No	s	No	Pravastatin	82	0.88	0.5363	NotSig	6105	0.12	No
Antilipemic Agents	No	s	No	Simvastatin	83	0.75	0.2116	NotSig	5146	0.1	No
Antilipemic Agents	No	s	No	Fenofibrate	84	1.156	0.5476	NotSig	2819	0.06	No
Antimigraine Agents	No	t	No	Zolmitriptan	85	1.083	0.8415	NotSig	206	1	No
Antineoplastic Agents	No	u	No	Methotrexate	86	0.467	0.0959	NotSig	1242	0.74	No
Antineoplastic Agents	No	u	No	Bicalutamide	87	0.833	0.7633	NotSig	426	0.26	No
Antiparkinsonian Agents	No	v	No	Levodopa+Carbidopa	88	1.636	0.1982	NotSig	2243	0.47	No
Antiparkinsonian Agents	No	v	No	Procyclidine	89	1	1	NotSig	2070	0.43	No
Antiparkinsonian Agents	No	v	No	Benztropine	90	1.25	0.638	NotSig	463	0.1	No
Anxiolytics, Sedatives, and Hypnotics	Yes	w	No	Lorazepam	91	1.507	< 0.0001	Up	17618	0.41	No
Anxiolytics, Sedatives, and Hypnotics	Yes	w	No	Oxazepam	92	1.667	< 0.0001	Up	11270	0.26	No
Anxiolytics, Sedatives, and Hypnotics	Yes	w	No	Temazepam	93	1.4	0.0465	NotSig	2955	0.07	No
Anxiolytics, Sedatives, and Hypnotics	Yes	w	No	Flurazepam	94	1.808	0.0006	Up	2707	0.06	No
Anxiolytics, Sedatives, and Hypnotics	Yes	w	No	Alprazolam	95	1.362	0.0511	NotSig	2464	0.06	No
Anxiolytics, Sedatives, and Hypnotics	Yes	w	No	Hydroxyzine	96	1.144	0.1958	NotSig	1800	0.04	No
Anxiolytics, Sedatives, and Hypnotics	Yes	w	No	Bromazepam	97	0.923	0.7291	NotSig	1785	0.04	No
Anxiolytics, Sedatives, and Hypnotics	Yes	w	No	Diazepam	98	0.859	0.4098	NotSig	1483	0.03	No
Anxiolytics, Sedatives, and Hypnotics	Yes	w	No	Nitrazepam	99	1.25	0.5059	NotSig	761	0.02	No
Beta-Adrenergic Blocking Agents	Yes	x	No	Metoprolol	100	1.664	< 0.0001	Up	17229	0.45	Yes
Beta-Adrenergic Blocking Agents	Yes	x	No	Bisoprolol	101	1.824	< 0.0001	Up	10212	0.27	No
Beta-Adrenergic Blocking Agents	Yes	x	No	Atenolol	102	1.283	0.1474	NotSig	6707	0.18	No
Beta-Adrenergic Blocking Agents	Yes	x	No	Acebutolol	103	0.389	0.034	Down	2355	0.06	No
Beta-Adrenergic Blocking Agents	Yes	x	No	Propranolol	104	0.667	0.1407	NotSig	1477	0.04	No
Bone Resorption Inhibitors	Yes	y	No	Alendronate	105	1.272	0.0678	NotSig	8680	0.53	No
Bone Resorption Inhibitors	Yes	y	No	Risedronate	106	1.013	0.9364	NotSig	6729	0.41	No
Bone Resorption Inhibitors	Yes	y	No	Calcium Carbonate+Etidronate Disodium	107	1.217	0.4845	NotSig	889	0.05	No
Calcium-channel Blocking Agents	Yes	z	No	Amlodipine	108	1.257	0.0133	NotSig	22353	0.56	No
Calcium-channel Blocking Agents	Yes	z	No	Diltiazem	109	1.74	0.0001	Up	11063	0.28	Yes
Calcium-channel Blocking Agents	Yes	z	No	Nifedipine	110	0.831	0.314	NotSig	6180	0.16	No
Cardiac drugs	Yes	aa	No	Digoxin	111	1.667	0.0002	Up	8623	0.74	Yes
Cardiac drugs	Yes	aa	No	Amiodarone	112	2.885	< 0.0001	Up	2376	0.2	Yes
Cardiac drugs	Yes	aa	No	Propafenone	113	1.375	0.4931	NotSig	404	0.03	No
Cardiac drugs	Yes	aa	No	Flecainide	114	6	0.0971	NotSig	310	0.03	No
Coagulants and anticoagulants Agents	Yes	ab	No	Asa Antiplatelet	115	1.3	0.0002	NotSig	36849	0.62	No
Coagulants and anticoagulants Agents	Yes	ab	No	Warfarin	116	1.611	< 0.0001	Up	13652	0.23	Yes
Coagulants and anticoagulants Agents	Yes	ab	No	Clopidogrel	117	1.75	0.0002	Up	8017	0.14	Yes
Coagulants and anticoagulants Agents	Yes	ab	No	Heparin	118	2.273	< 0.0001	Up	500	0.01	No
Contraceptives	Yes	ac	No	Ethinyl Estradiol+Levonorgestrel	119	1.017	0.9263	NotSig	1832	0.56	No
Contraceptives	Yes	ac	No	Ethinyl Estradiol+Norgestimate	120	1	1	NotSig	788	0.24	No
Contraceptives	Yes	ac	No	Ethinyl Estradiol+Desogestrel	121	1.722	0.0666	NotSig	662	0.2	No
Digestants	Yes	ad	No	Pancrelipase	122	3.1	0.0019	Up	595	1	No
Diuretics	Yes	ae	No	Furosemide	123	2.502	< 0.0001	Up	28799	0.59	Yes
Diuretics	Yes	ae	No	Hydrochlorothiazide	124	0.93	0.4939	NotSig	11635	0.24	No
Diuretics	Yes	ae	No	Hydrochlorothiazide+Triamterene	125	1.102	0.5902	NotSig	3952	0.08	No
Diuretics	Yes	ae	No	Indapamide	126	1.094	0.7141	NotSig	2940	0.06	No
Diuretics	Yes	ae	No	Hydrochlorothiazide+Amiloride	127	0.333	0.0571	NotSig	648	0.01	No
Diuretics	Yes	ae	No	Metolazone	128	1.714	0.2571	NotSig	554	0.01	No
Diuretics	Yes	ae	No	Hydrochlorothiazide+Spironolactone	129	2	0.4236	NotSig	162	0	No
Diuretics	Yes	ae	No	Amiloride	130	0.5	0.5715	NotSig	128	0	No
Diuretics	Yes	ae	No	Triamterene	131	0.5	0.5715	NotSig	62	0	No
Estrogens and Antiestrogens	No	af	No	Estrogens Conjugated Biologic	132	0.821	0.2781	NotSig	3380	0.73	No
Estrogens and Antiestrogens	No	af	No	Tamoxifen	133	1.286	0.618	NotSig	640	0.14	No
Estrogens and Antiestrogens	No	af	No	Raloxifene	134	0.273	0.0461	Down	626	0.13	No
Genitourinary Smooth Muscle Relaxants	No	ag	No	Oxybutynin	135	1.125	0.5213	NotSig	2743	0.74	No
Genitourinary Smooth Muscle Relaxants	No	ag	No	Tolterodine	136	0.875	0.7152	NotSig	971	0.26	No
Histamine H2-Antagonists	Yes	ah	No	Pantoprazole	137	2.116	< 0.0001	Up	28410	0.5	Yes
Histamine H2-Antagonists	Yes	ah	No	Omeprazole	138	1.348	< 0.0001	NotSig	11663	0.21	No
Histamine H2-Antagonists	Yes	ah	No	Esomeprazole	139	1.47	0.0001	NotSig	7360	0.13	No
Histamine H2-Antagonists	Yes	ah	No	Lansoprazole	140	2.699	< 0.0001	Up	4501	0.08	No
Histamine H2-Antagonists	Yes	ah	No	Ranitidine	141	1.173	0.2196	NotSig	2394	0.04	No
Histamine H2-Antagonists	Yes	ah	No	Rabeprazole	142	1.091	0.7181	NotSig	1065	0.02	No
Histamine H2-Antagonists	Yes	ah	No	Famotidine	143	1.5	0.2766	NotSig	379	0.01	No
Histamine H2-Antagonists	Yes	ah	No	Dexlansoprazole	144	2.2	0.0387	Up	274	0	No
Histamine H2-Antagonists	Yes	ah	No	Sucralfate	145	1.15	0.6476	NotSig	236	0	No
Histamine H2-Antagonists	Yes	ah	No	Cimetidine	146	0.462	0.1172	NotSig	136	0	No
Histamine H2-Antagonists	Yes	ah	No	Nizatidine	147	0.4	0.2734	NotSig	93	0	No
Histamine H2-Antagonists	Yes	ah	No	Misoprostol	148	2.8	0.0481	Up	82	0	No
Hypotensive Agents	No	ai	No	Clonidine	149	1.178	0.4195	NotSig	2255	0.76	No
Hypotensive Agents	No	ai	No	Hydralazine	150	2.143	0.0959	NotSig	726	0.24	No
Miscellaneous Autonomic Drugs	No	aj	No	Nicotine	151	1.045	0.6933	NotSig	1452	0.94	No
Miscellaneous Autonomic Drugs	No	aj	No	Varenicline	152	1.818	0.1112	NotSig	100	0.06	No
Miscellaneous Therapeutic Agents	No	ak	No	Pentosan	153	0.75	0.7064	NotSig	198	0.71	No
Miscellaneous Therapeutic Agents	No	ak	No	Pizotifen	154	0.667	0.6569	NotSig	79	0.29	No
Parasympathomemetic (Cholinergic) Agents	Yes	al	No	Donepezil	155	1.76	0.024	Up	4048	0.8	Yes
Parasympathomemetic (Cholinergic) Agents	Yes	al	No	Galantamine	156	1	1	NotSig	1015	0.2	No
Pituitary	No	am	No	Desmopressin	157	0.714	0.5655	NotSig	269	1	No
Progestins	No	an	No	Medroxyprogesterone	158	1.5	0.0264	NotSig	1803	1	No
Prokinetic Agents	Yes	ao	No	Domperidone	159	1.89	< 0.0001	Up	4272	0.82	Yes
Prokinetic Agents	Yes	ao	No	Metoclopramide	160	2.155	< 0.0001	Up	827	0.16	Yes
Prokinetic Agents	Yes	ao	No	Cisapride	161	0.765	0.4665	NotSig	122	0.02	No
Psychotherapeutic Agents	Yes	ap	No	Citalopram	162	1.922	< 0.0001	Up	10733	0.16	Yes
Psychotherapeutic Agents	Yes	ap	No	Quetiapine	163	1.839	< 0.0001	Up	7806	0.12	Yes
Psychotherapeutic Agents	Yes	ap	No	Venlafaxine	164	1.394	0.0117	NotSig	7337	0.11	No
Psychotherapeutic Agents	Yes	ap	No	Paroxetine	165	1.395	0.0184	NotSig	5608	0.08	No
Psychotherapeutic Agents	Yes	ap	No	Risperidone	166	2.694	< 0.0001	Up	5005	0.08	No
Psychotherapeutic Agents	Yes	ap	No	Amitriptyline	167	1.058	0.6338	NotSig	4899	0.07	No
Psychotherapeutic Agents	Yes	ap	No	Trazodone	168	1.516	0.0018	Up	4633	0.07	Yes
Psychotherapeutic Agents	Yes	ap	No	Olanzapine	169	1.589	0.0066	Up	4070	0.06	No
Psychotherapeutic Agents	Yes	ap	No	Sertraline	170	1.714	0.0113	Up	2893	0.04	No
Psychotherapeutic Agents	Yes	ap	No	Mirtazapine	171	1.732	0.0051	Up	2664	0.04	Yes
Psychotherapeutic Agents	Yes	ap	No	Bupropion	172	1.348	0.1251	NotSig	1569	0.02	No
Psychotherapeutic Agents	Yes	ap	No	Fluoxetine	173	0.571	0.0742	NotSig	1121	0.02	No
Psychotherapeutic Agents	Yes	ap	No	Doxepin	174	3	0.0198	Up	1000	0.01	No
Psychotherapeutic Agents	Yes	ap	No	Haloperidol	175	1.895	0.0242	Up	844	0.01	No
Psychotherapeutic Agents	Yes	ap	No	Fluvoxamine	176	0.909	0.8273	NotSig	783	0.01	No
Psychotherapeutic Agents	Yes	ap	No	Methotrimeprazine	177	1.786	0.0824	NotSig	757	0.01	No
Psychotherapeutic Agents	Yes	ap	No	Prochlorperazine	178	1.978	< 0.0001	Up	637	0.01	No
Psychotherapeutic Agents	Yes	ap	No	Loxapine	179	1.833	0.2324	NotSig	552	0.01	No
Psychotherapeutic Agents	Yes	ap	No	Nortriptyline	180	1.4	0.4164	NotSig	471	0.01	No
Psychotherapeutic Agents	Yes	ap	No	Trimipramine	181	0.889	0.8085	NotSig	466	0.01	No
Psychotherapeutic Agents	Yes	ap	No	Chlorpromazine	182	1.091	0.8349	NotSig	328	0	No
Psychotherapeutic Agents	Yes	ap	No	Clozapine	183	2	0.4236	NotSig	322	0	No
Psychotherapeutic Agents	Yes	ap	No	Imipramine	184	1	1	NotSig	299	0	No
Psychotherapeutic Agents	Yes	ap	No	Desipramine	185	1.833	0.2324	NotSig	283	0	No
Psychotherapeutic Agents	Yes	ap	No	Clomipramine	186	0.333	0.3414	NotSig	258	0	No
Psychotherapeutic Agents	Yes	ap	No	Nefazodone	187	1.091	0.8349	NotSig	220	0	No
Psychotherapeutic Agents	Yes	ap	No	Fluphenazine	188	1	1	NotSig	155	0	No
Psychotherapeutic Agents	Yes	ap	No	Aripiprazole	189	1.5	0.5299	NotSig	143	0	No
Psychotherapeutic Agents	Yes	ap	No	Moclobemide	190	1.5	0.5299	NotSig	142	0	No
Psychotherapeutic Agents	Yes	ap	No	Duloxetine	191	0.25	0.215	NotSig	116	0	No
Psychotherapeutic Agents	Yes	ap	No	Flupentixol	192	3	0.3414	NotSig	112	0	No
Psychotherapeutic Agents	Yes	ap	No	Zuclopenthixol	193	2.333	0.2195	NotSig	108	0	No
Psychotherapeutic Agents	Yes	ap	No	Ziprasidone	194	2	0.5715	NotSig	107	0	No
Psychotherapeutic Agents	Yes	ap	No	Tryptophan	195	2.5	0.2734	NotSig	105	0	No
Psychotherapeutic Agents	Yes	ap	No	Pimozide	196	1	1	NotSig	86	0	No
Psychotherapeutic Agents	Yes	ap	No	Maprotiline	197	4	0.215	NotSig	66	0	No
Renin-Angiotensin-Aldosterone System Inhibitors	No	aq	No	Ramipril	198	1.554	0.0002	Up	13626	0.26	No
Renin-Angiotensin-Aldosterone System Inhibitors	No	aq	No	Enalapril	199	1.163	0.4683	NotSig	5474	0.11	No
Renin-Angiotensin-Aldosterone System Inhibitors	No	aq	No	Irbesartan	200	0.873	0.4618	NotSig	4633	0.09	No
Renin-Angiotensin-Aldosterone System Inhibitors	No	aq	No	Perindopril Erbumine	201	1.721	0.0046	Up	4340	0.08	No
Renin-Angiotensin-Aldosterone System Inhibitors	No	aq	No	Valsartan	202	1.356	0.1216	NotSig	3910	0.08	No
Renin-Angiotensin-Aldosterone System Inhibitors	No	aq	No	Candesartan	203	1.139	0.5691	NotSig	3635	0.07	No
Renin-Angiotensin-Aldosterone System Inhibitors	No	aq	No	Spironolactone	204	3.152	< 0.0001	Up	3479	0.07	Yes
Renin-Angiotensin-Aldosterone System Inhibitors	No	aq	No	Losartan	205	0.8	0.3183	NotSig	3368	0.06	No
Renin-Angiotensin-Aldosterone System Inhibitors	No	aq	No	Fosinopril	206	0.944	0.8111	NotSig	3293	0.06	No
Renin-Angiotensin-Aldosterone System Inhibitors	No	aq	No	Valsartan+Hydrochlorothiazide	207	1.08	0.7816	NotSig	2465	0.05	No
Renin-Angiotensin-Aldosterone System Inhibitors	No	aq	No	Telmisartan	208	0.692	0.2304	NotSig	1985	0.04	No
Renin-Angiotensin-Aldosterone System Inhibitors	No	aq	No	Lisinopril	209	1.19	0.5558	NotSig	1882	0.04	No
Replacement preparations	Yes	ar	No	Calcium Carbonate+Vitamin D	210	1.035	0.695	NotSig	20666	0.44	No
Replacement preparations	Yes	ar	No	Potassium Chloride	211	2.675	< 0.0001	Up	13127	0.28	Yes
Replacement preparations	Yes	ar	No	Calcium Carbonate	212	1.321	0.0064	NotSig	10345	0.22	No
Replacement preparations	Yes	ar	No	Calcium Salts	213	1.778	0.0007	Up	2404	0.05	No
Respiratory Smooth Muscle Relaxants	No	as	No	Theophylline	214	1.303	0.2527	NotSig	1497	1	No
Skeletal Muscle Relaxants	No	at	No	Cyclobenzaprine	215	1.237	0.0915	NotSig	1331	0.79	No
Skeletal Muscle Relaxants	No	at	No	Baclofen	216	1.143	0.7964	NotSig	363	0.21	No
Sympatholytic (Adrenergic Blocking) Agents	Yes	au	No	Tamsulosin	217	1.9	< 0.0001	Up	7124	0.85	Yes
Sympatholytic (Adrenergic Blocking) Agents	Yes	au	No	Alfuzosin	218	1.26	0.4468	NotSig	1236	0.15	No
Sympathomimetic (Adrenergic) Agents	Yes	av	No	Salbutamol	219	1.258	< 0.0001	NotSig	8241	0.52	No
Sympathomimetic (Adrenergic) Agents	Yes	av	No	Ipratropium+Salbutamol	220	1.967	< 0.0001	Up	3368	0.21	No
Sympathomimetic (Adrenergic) Agents	Yes	av	No	Salmeterol+Fluticasone	221	1.217	0.118	NotSig	2931	0.18	No
Sympathomimetic (Adrenergic) Agents	Yes	av	No	Salmeterol	222	1.243	0.1632	NotSig	1400	0.09	No
Thyroid Agents	Yes	aw	No	Levothyroxine	223	1.311	0.0241	NotSig	30779	1	No
Urinary Anti-infectives	Yes	ax	No	Nitrofurantoin	224	1.587	0.0002	Up	728	1	No
Vasodilatating Agents	Yes	ay	No	Isosorbide Mononitrate	225	1.48	0.0229	NotSig	6132	1	No
Vitamin B Complex	Yes	az	No	Folic Acid	226	1.85	0.0008	Up	4205	0.54	No
Vitamin B Complex	Yes	az	No	Vitamin B12	227	1.55	0.0015	Up	2107	0.27	No
Vitamin B Complex	Yes	az	No	Vitamin B1	228	1.17	0.4973	NotSig	1082	0.14	No
Vitamin B Complex	Yes	az	No	Vitamin B6	229	1.42	0.3556	NotSig	340	0.04	No
Vitamin D	Yes	ba	No	Vitamin D3	230	1.32	0.0026	NotSig	12828	0.9	No
Vitamin D	Yes	ba	No	Alfacalcidol	231	1.538	0.2266	NotSig	1432	0.1	No
