# Supplementary material for: Impacts of Medications on Microbiome-mediated Protection against Enteric Pathogens
Source: Research Square preprint supplement (doi:10.21203/rs.3.rs-5199936/v1), 2024-10-18
Supplement: Supplementary file 3 [file Extended_Data_Table_3.xlsx]

## Sheet: Table_3
	Chemical name	Dosage used in mice (mg/kg)	Source PMID for drug dosage	Vendor	Catalog#
1	Digoxin	0.5; 5	33859430; 24745332	Cayman Chemical	22266
2	Amiodarone	90	15520326	Cayman Chemical	15213
3	Furosemide	50	5091161	Cayman Chemical	17273-5
4	Pantoprazole	50	22527206	Cayman Chemical	21345-1
5	Citalopram	30	20003619	Sigma	PHR1640
6	Quetiapine	10	15083255	Cayman Chemical	22603
7	Trazodone	20	11352540	Sigma	T6154
8	Mirtazapine	10	32988385	Fisher Scientific	201810
9	Clonazepam	2	30733391	Sigma	C1277
10	Ferrous sulfate	1	30241424	Sigma	F8048
11	Finasteride	100	21606174	Cayman Chemical	14938
12	Domeridone	20	23667771	Cayman Chemical	18875
13	Metoclopramide	20	23667771	Cayman Chemical	39844
14	Tamsulosin	1	19254278	Cayman Chemical	24020-5
15	Potassium chloride	50	20163676	J.T. Baker	3040-01
16	Metoprolol	10	16733693	Sigma	PHR1076
17	Diltiazem	50	31158845	Sigma	1205003
18	Warfarin	1	18772448	Sigma	A2250
19	Clopidogrel	20	26712119	Sigma	PHR1431
20	Donepezil	5	21750701	Cayman Chemical	13245
21	Spirinolactone	40	29255387	Sigma	S3378
Other drugs used in the study
22	Dihydrodigoxin	5		Toronto Research Chemicals	D452680
23	Vancomycin	25	39259805	Alfa Aesar	J62790-03
