# Supplementary material for: Impacts of Medications on Microbiome-mediated Protection against Enteric Pathogens
Source: Research Square preprint supplement (doi:10.21203/rs.3.rs-5199936/v1), 2024-10-18
Supplement: Supplementary file 4 [file Extended_Data_Table_4.xlsx]

## Sheet: Table_4
Drug/Drug Class	OR	95% CI	P-value
Conditional Logistic Regression, only Digoxin
Digoxin	1.667	1.28-2.17	0.0002
Conditonal Logistic Regression, adjusting for the three drug classes expected to be associated with increased GI infection risk
Digoxin	1.574	1.20-2.06	0.001
Conditonal Logistic Regression on the three expected drug classes and their association with GI infections
Antibiotics	1.575	1.51-1.64	<.0001
Immunosuppressants	1.675	1.44-1.81	<.0001
Antidiarrheals	2.514	2.12-2.98	<.0001
