# Supplementary material for: Impacts of Medications on Microbiome-mediated Protection against Enteric Pathogens
Source: Research Square preprint supplement (doi:10.21203/rs.3.rs-5199936/v1), 2024-10-18
Supplement: Supplementary file 5 [file Extended_Data_Table_5.xlsx]

## Sheet: Table_5
	Name	Sequence	PMID
Primers for qPCR
Segemented Filamentous Bacteria	SFB_F	GACGCTGAGGCATGAGAGCA	21998396
	SFB_R	GACGGCACGGATTGTTATTC	21998396
Total bacteria	EU_F	ACTCCTACGGGAGGCAGCAGT	21998396
	EU_F	ATTACCGCGGCTGCTGGC	21998396
	cgr2_F	GAGGCCGTCGATTGGATGAT	29761785
	cgr2_F	ACCGTAGGCATTGTGGTTGT	29761785
	16SrRNA_F	CAGCAGGGAAGAAATTCGAC	23869020
	16SrRNA_R	TTGAGCCCTCGGATTAGAGA	23869020
Primers for genotyping
C57BL/6N vil-defb39	Defb39_F	GCCTTCTCCTCTAGGCTCGT	This study
	Defb39 R	CCCCTGGTACCACCGGTTA	This study
B6.129P2-Rorctm1Litt/J	WT_F	GACCACCTCAAACTCCGAGA	The Jackson Laboratory
	Common_R	GGAGCAGAGCCTGGAGTAGA	The Jackson Laboratory
	Mut_F	CCACACGCGTCACCTTAATA	The Jackson Laboratory
Ror𝛄STOP	WT_F	GATTTTGCATTGGGCCACATTTATCA	39151019
	Common_R	GACTGTCTGTATCCAGGCAGCAAG	39151019
	Mut_F	GCTGAGCTGTCAGAAGGTCGA	39151019
CD4-Cre	CD4-Cre_Com_F	GTTCTTTGTATATATTGAATGTTAGCC	The Jackson Laboratory
	CD4-Cre_WT_R	TATGCTCTAAGGACAAGAATTGACA	The Jackson Laboratory
	CD4-Cre_Mut_R	CTTTGCAGAGGGCTAACAGC	The Jackson Laboratory
Primers for cloning
	pet21_F	GCGGCCGCACTCGAGCAC	This study
	pet21_R	ATGTATATCTCCTTCTTAAAGTTAAACAAAATTATTTCTAGAGGGGAATTGTTATCCGC	This study
	active_defb39_F	TTTAAGAAGGAGATATACATATGGACGATTCAATACAATG	This study
	active_defb39_R	TGGTGCTCGAGTGCGGCCGCCACCTTCTTCTTCCTTGG	This study
Primers for qRT-PCR
	IL17a_F	GGACTCTCCACCGCAATGA	18716618
	IL17a_R	GGCACTGAGCTTCCCAGATC	18716618
	IL17f_F	CCCCATGGGATTACAACATCAC	18716618
	IL17f_R	CATTGATGCAGCCTGAGTGTCT	18716618
	SAA1_F	ATCACCAGATCTGCCCAGGA	31097581
	SAA1_R	CCTTGGAAAGCCTCGTGAAC	31097581
	SAA2_F	ACCAGATCTGCCCAGGAGAC	31097581
	SAA2_R	GCATGGAAGTATTTGTCTCCATCT	31097581
	Reg3g_F	ATGGCTCCTATTGCTATGCC	34324837
	Reg3g_R	GATGTCCTGAGGGCCTCTT	34324837
	Il22_F	GGCCAGCCTTGCAGATAACA	33031742
	Il22_R	GCTGATGTGACAGGAGCTGA	33031742
	IL6_F	TGATGGATGCTACCAAACTGG	33031742
	IL6_R	GTGACTCCAGCTTATCTCTTGG	33031742
	Nos2_F	TTGGGTCTTGTTCACTCCACGG	33031742
	Nos2_R	CCTCTTTCAGGTCACTTTGGTAGG	33031742
	Lcn2_F	AAGGCAGCTTTACGATGTACAGC	33031742
	Lcn2_R	CTTGCACATTGTAGCTCTGTACC	33031742
	IL10_F	GGTTGCCAAGCCTTATCGG	33031742
	IL10_R	GAGAAATCGATGACAGCGCC	33031742
	Ifng_F	CTTCCTCATGGCTGTTTCTGG	33031742
	Ifng_R	ACGCTTATGTTGTTGCTGATGG	33031742
	Tnfa_F	CCCACGTCGTAGCAAACCAC	33031742
	Tnfa_R	GTGAGGAGCACGTAGTCGG	33031742
	Lyz1_F	GTCACACTTCCTCGCTTTCC	34324837
	Lyz1_R	TGACTGTCACCAGCATCCAT	34324837
	Muc2_F	GCTGACGAGTGGTTGGTGAATG	34324837
	Muc2_R	GATGAGGTGGCAGACAGGAGA	34324837
	Rorc_F	GGAGGACAGGGAGCCAAGTT	18716618
	Rorc_R	CCGTAGTGGATCCCAGATGACT	18716618
	Foxp3_F	GCA ATA GTT CCT TCC CAG AGT TCT	21512004
	Foxp3_R	GGA TGG CCC ATCGGA TAA G	21512004
	GapdH_F	GGCTGCCCAGAACA TCA TCCCTGCA T	28111202
	GapdH_R	ACGTCAGATCCACGACGGACACATTGG	28111202
	Defb1_F	AATACAAATGCCTTCAACATGGAG	This study
	Defb1_R	ATCCATCGCTCGTCCTTTATG	This study
	Defb25_F	TCCTGGTCCTGAGTCATGTAC	This study
	Defb25_R	AGAATAGGACAGGCAACACAG	This study
	Defa5_F	AACAATTCTCCAGGTGACCC	This study
	Defa5_R	GTATTAGTCTCTTCATCTGTTTTGTGG	This study
	Defb39_F	CTCCCAGATCAACCCAGTTTC	This study
	Defb39_R	ACGTGCCGATCTCATCTTG	This study
	Defb37_F	TCCAACTTCCAGAACAACCC	This study
	Defb37_R	CCTTCATAACAGGTGCCAACTAC	This study
	CRAMP_F	TCTCTACCGTCTCCTGGACCTG	This study
	CRAMP_R	CCACATACAGTCTCCTTCACTCG	This study
	Defb2_F	CTTTCTACCAGCCATGAGGAC	This study
	Defb2_R	CTGACACAGTACCCTCCATTG	This study
	mmp7_F	TGGAAAGAGGAACACGCTG	This study
	mmp7_R	ACAAGGAAGAGGGAAACAGG	This study
	Defa5_F	AACAATTCTCCAGGTGACCC	This study
	Defa5_R	GTATTAGTCTCTTCATCTGTTTTGTGG	This study
	Defa21_F	GATCCTATCCAAAACACAGATGAAG	This study
	Defa21_R	CGATTTCTACAAAGGCAGATCAG	This study
	Defb6_F	TGCAGCCTTTTCCCAATTAATC	This study
	Defb6_R	GGTCCTTTTATCTATTTTCTGCGG	This study
	Defb18_F	AAATGTTCCCTGGTCCGTG	This study
	Defb18_R	CCATTCTTTTGTATTCTCGCACC	This study
	Defb20_F	TCTCCTTGTTTTGCTGTTTGTG	This study
	Defb20_R	CAACAGTATTTCCCATGCAGG	This study
	Defb25_F	TTCTGCTCATTGTGGCTCTC	This study
	Defb25_R	AGGTGCATGAAGGTCTCTTG	This study
	Defcr-rs1_F	ACCCAAGCTCCAAATACACAG	This study
	Defcr-rs1_R	CGTGAGGACCAAAAGCAAATG	This study
	Defa20_F	AAGTTTATGGGACCTGCTCAG	This study
	Defa20_R	TTGAGAAGTGGTTATCAGGCC	This study
	Defa-rs7_F	CCTCTTTGCCCTTGTCCTG	This study
	Defa-rs7_R	TTAGTCTCTTCATCTGTGTTCTGG	This study
	Defb39_F	CTCCCAGATCAACCCAGTTTC	This study
	Defb39_R	ACGTGCCGATCTCATCTTG	This study
	Defb40_F	ACCCAGTTGCTGTTCTTGAC	This study
	Defb40_R	GATTTCTGGCAAACCAACGG	This study
	Defb45_F	TGATAGACACAAGCCAGCAC	This study
	Defb45_R	TCTTGGCACACTCTTCACG	This study
	Defb46_F	TCTCTTTGCATTTCTCCTGGTG	This study
	Defb46_R	ACATGCCAATCTCTCTAGTGC	This study
	Ccl20_F	AAGACAGATGGCCGATGAAG	This study
	Ccl20_R	TCTTGACTCTTAGGCTGAGGA	This study
	Muc4_F	CCTCAAACTACCATAACCCCAG	This study
	Muc4_R	TGTCTGAATTTGGTCACGGG	This study
