# Supplementary material for: Impacts of Medications on Microbiome-mediated Protection against Enteric Pathogens
Source: Research Square preprint supplement (doi:10.21203/rs.3.rs-5199936/v1), 2024-10-18
Supplement: Supplementary file 6 [file Extended_Data_Table_6.xlsx]

## Sheet: Table_6
Strain name	Additonal information	Reference/Courtesy		PMID
Mouse strains
C57BL/6NTac or C57BL/6N	B6-F; B6-M	Taconic Biosciences
C57BL/6J	Strain #:000664	The Jackson Laboratory
C57BL/6N Nramp1+/+		Jorge E. Galán	Yale University	26933955
Vil-defb39 C57BL/6N		This study
B6.129P2-Rorctm1Litt/J	Strain #:007571	The Jackson Laboratory
Ror𝛄STOP/Cd4-cre+		Ivaylo I. Ivanov	Columbia University	39151019
Ror𝛄STOP		Ivaylo I. Ivanov	Columbia University	39151019
Bacterial strains
Salmonella enterica subsp. Typhimurium (SL1344)	WT SL1344	Jorge E. Galán	Yale University	7015147
Salmonella enterica subsp. Typhimurium (SL1344)	S. Tm △invA (SB1901)	Jorge E. Galán	Yale University	20876096
Segmented filamentous bacteria (Candidatus savagella)	SFB-mono associated mouse cecal content	Ivaylo I. Ivanov	Columbia University
Escherichia coli	WT BW25113	Gerard D. Wright	McMaster University
Escherichia coli	BW25113 △bamB△tolC	Gerard D. Wright	McMaster University	24965651
Bacteroides ovatus		ATCC8483
Bacteroides fragilis		ATCC43859
Bacteroides stercoris		ATCC43183
Parabacteroides distasonis		ATCC8503
Bifidobacterium longum subsp. Infantis		CCUG52486
Bifidobacterium adolescentis		ATCC 15703
Collinsella aerofaciens		ATCC25986
Clostridium ramosum		DSM1402
Ruminococcus gnavus		ATCC29149
E. coli DH5a strain	Strain used for cloning
E. coli BL21 strain	Strain used for protein purification
Plasmids
12.4kbVillin-ΔATG	Addgene	19358
p12.4kbVillin-ΔATG-defb39	Insert sequence: ATGAAGATCTCCTACTTTCTGCTGCTGATCCTCTCTCTAGGCAGCTCCCAGATCAACCCAGTTTCTGGTGACGATTCAATACAATGTTTTCAAAAGAATAACACCTGTCACACCAACCAATGCCCATATTTTCAAGATGAGATCGGCACGTGTTATGACAGAAGAGGCAAGTGTTGCCAAAAACGCCTTTTGCATATCAGAGTTCCAAGGAAGAAGAAGGTGTAA	Available upon request	Sequence for defb39 prodefensin peptide was used for cloning	This study
pET21_NESG	Amp resistance; encodes C-terminal 6X His-tag; plasmid used to clone defb39 gene insert	New England Structural Genomics Consortium
pET21_NESG_defb39	This study
