# Supplementary material for: Impacts of Medications on Microbiome-mediated Protection against Enteric Pathogens
Source: Research Square preprint supplement (doi:10.21203/rs.3.rs-5199936/v1), 2024-10-18
Supplement: Supplementary file 7 [file Extended_Data_Table_7.xlsx]

## Sheet: Table_7
Community Idenitfier (PMID: 31158845)	Count (RPKM)	Hits
1	0.288589	5
2	0	0
3	0	0
4	0.536122	11
5	0	0
6	3.37534	67
8	0	0
9	0.336654	5
10	0	0
11	0	0
12	0.197378	4
13	0.142923	3
14	0	0
15	1.18888	27
16	0.742252	16
17	0.156521	3
18	0	0
19	0	0
20	0	0
22	0.449455	8
23	2.80831	57
24	0	0
25	0.124694	3
26	2.42286	47
28	1.35675	28
Note: Shortbred function run failed in three community #7, #21, #27; qPCR based methods were also used as a complementary strategy
