# Supplementary material for: Impacts of Medications on Microbiome-mediated Protection against Enteric Pathogens
Source: Research Square preprint supplement (doi:10.21203/rs.3.rs-5199936/v1), 2024-10-18
Supplement: Supplementary file 8 [file Extended_Data_Table_8.xlsx]

## Sheet: Table_8
Community Idenitfier (PMID: 31158845)	Age	Sex
2	45	M
3	45	M
5	45	F
8	54	M
10	55	M
21	24	M
24	40	F
25	44	F
