# Supplementary material for: Impacts of Medications on Microbiome-mediated Protection against Enteric Pathogens
Source: Research Square preprint supplement (doi:10.21203/rs.3.rs-5199936/v1), 2024-10-18
Supplement: Supplementary file 9 [file Extended_Data_Table_9.xlsx]

## Sheet: Table_9
gene	log2FoldChange (Digoxin/PBS)	stat	P value	padj	ENTREZID	ENSEMBL
Reg3g	-3.10607	-30.0543	1.92e-198	1e-05	19695	ENSMUSG00000030017
Reg3b	-2.75271	-21.4556	4.05e-102	1e-05	18489	ENSMUSG00000071356
Defa25	-2.09294	-0.791105	0.428883	0.802685	13236	ENSMUSG00000094687
Ltf	-2.07857	-10.1041	5.3e-24	1e-05	17002	ENSMUSG00000032496
Reg3a	-1.68267	-12.0425	2.12e-33	1e-05	19694	ENSMUSG00000079516
S100a9	-0.842821	-1.28571	0.198545	0.198545	20202	ENSMUSG00000056071
Tlr2	-0.719178	-5.11177	3.19e-07	2.19e-05	24088	ENSMUSG00000027995
Atp7a	-0.715679	-3.28809	0.00100869	0.0202179	11977	ENSMUSG00000033792
Pglyrp1	-0.464276	-5.0018	5.68e-07	3.62e-05	21946	ENSMUSG00000030413
Tlr1	-0.428127	-2.46323	0.0137692	0.136761	21897	ENSMUSG00000044827
Pla2g2a	-0.394706	-2.11169	0.0347131	0.239806	18780	ENSMUSG00000058908
Reg3d	-0.311743	-0.626766	0.530813	0.85507	30053	ENSMUSG00000068341
S100a8	-0.238181	-0.396832	0.691491	0.691491	20201	ENSMUSG00000056054
Atox1	-0.181523	-1.84643	0.0648304	0.341767	11927	ENSMUSG00000018585
Pdzd11	-0.0538335	-0.604363	0.545602	0.861631	72621	ENSMUSG00000015668
S100a1	-0.0330872	-0.228982	0.818883	0.956982	20193	ENSMUSG00000044080
Lcn2	0.0394304	0.188499	0.850486	0.965433	16819	ENSMUSG00000026822
Defa3	0.0498	0.241666	0.809039	0.954167	13237	ENSMUSG00000074440
Defb1	0.104093	0.387472	0.698407	0.920808	13214	ENSMUSG00000044748
Defa23	0.152778	0.293821	0.768895	0.94398	497114	ENSMUSG00000074446
Rnase6	0.17255	1.35502	0.17541	0.573894	78416	ENSMUSG00000021880
Defa26	0.212483	1.28715	0.198041	0.603251	626708	ENSMUSG00000060070
Def6	0.279496	2.15181	0.0314125	0.22548	23853	ENSMUSG00000002257
Pglyrp2	0.289282	1.33676	0.181302	0.580944	57757	ENSMUSG00000079563
Ccr6	0.300223	1.0361	0.300154	0.710764	12458	ENSMUSG00000040899
Defa17	0.307563	1.76682	0.0772576	0.3786	23855	ENSMUSG00000060208
Defa5	0.395877	1.04858	0.294369	0.705547	13239	ENSMUSG00000074439
Slc11a1	0.403221	2.44241	0.0145897	0.141913	18173	ENSMUSG00000026177
Cd4	0.404853	2.88355	0.00393225	0.0565191	12504	ENSMUSG00000023274
Itln1	0.434912	2.79598	0.00517429	0.0691337	16429	ENSMUSG00000038209
Camp	0.477706	0.310101	0.756484	0.756484	12796	ENSMUSG00000038357
Defa24	0.508849	3.12065	0.0018045	0.031577	503491	ENSMUSG00000064213
Defa22	0.646135	3.48433	0.000493368	0.0114594	382059	ENSMUSG00000074443
Defa20	0.657686	3.97422	7.06e-05	0.00235683	68009	ENSMUSG00000095066
Defa21	0.660554	3.12025	0.00180701	0.0315902	66298	ENSMUSG00000074447
Defb42	0.965899	0.62848	0.529689	0.529689	619548	ENSMUSG00000054763
Leap2	1.08583	4.19285	2.75e-05	0.00106777	259301	ENSMUSG00000036216
Defb37	1.41241	5.62425	1.86e-08	1e-05	353320	ENSMUSG00000053695
Defb40	1.60076	1.59421	0.110889	0.110889	360217	ENSMUSG00000053678
Defb6	1.7603	0.930906	0.351902	0.351902	116746	ENSMUSG00000050756
Prtn3	2.10936	1.64343	0.100294	0.100294	19152	ENSMUSG00000057729
Defb39	2.11064	3.58313	0.000339506	0.00844036	360214	ENSMUSG00000061847
